# Supplementary material for: Elimination of Microplastics at Different Stages in Wastewater Treatment Plants
Source: MDPI journal article supplement (doi:10.3390/w14152404), 2022-08-03
Supplement: s1 [file s1]

Archive with 1 entries (1 files):
- water-1803806-supplementary.pdf
