# Supplementary material for: Elimination of Microplastics at Different Stages in Wastewater Treatment Plants
Source: MDPI journal article supplement (doi:10.3390/w14152404), 2022-08-03
Supplement: s1 [file s1 › water-1803806-supplementary.pdf]

Supplementary materials

# Elimination of Microplastic at Different Stage in Wastewater Treatment Plants

Hyuk Jun Kwon <sup>1</sup>, Haerul Hidayaturrehman <sup>1,2</sup>, Shaik Gouse Peera <sup>1,\*</sup> and Tae Gwan Lee <sup>1,\*</sup>

<sup>1</sup> Department of Environmental Science, Keimyung University, Daegu 42601, Republic of Korea; kanata86@nate.com (H.J.K.); haerul.hidayat@gmail.com (H.H.)

<sup>2</sup> National Research and Innovation Agency, Central Jakarta, 10340, Indonesia

\* Correspondence: gouse@kmu.ac.kr (S.G.P.); wateree@kmu.ac.kr (T.G.L.)

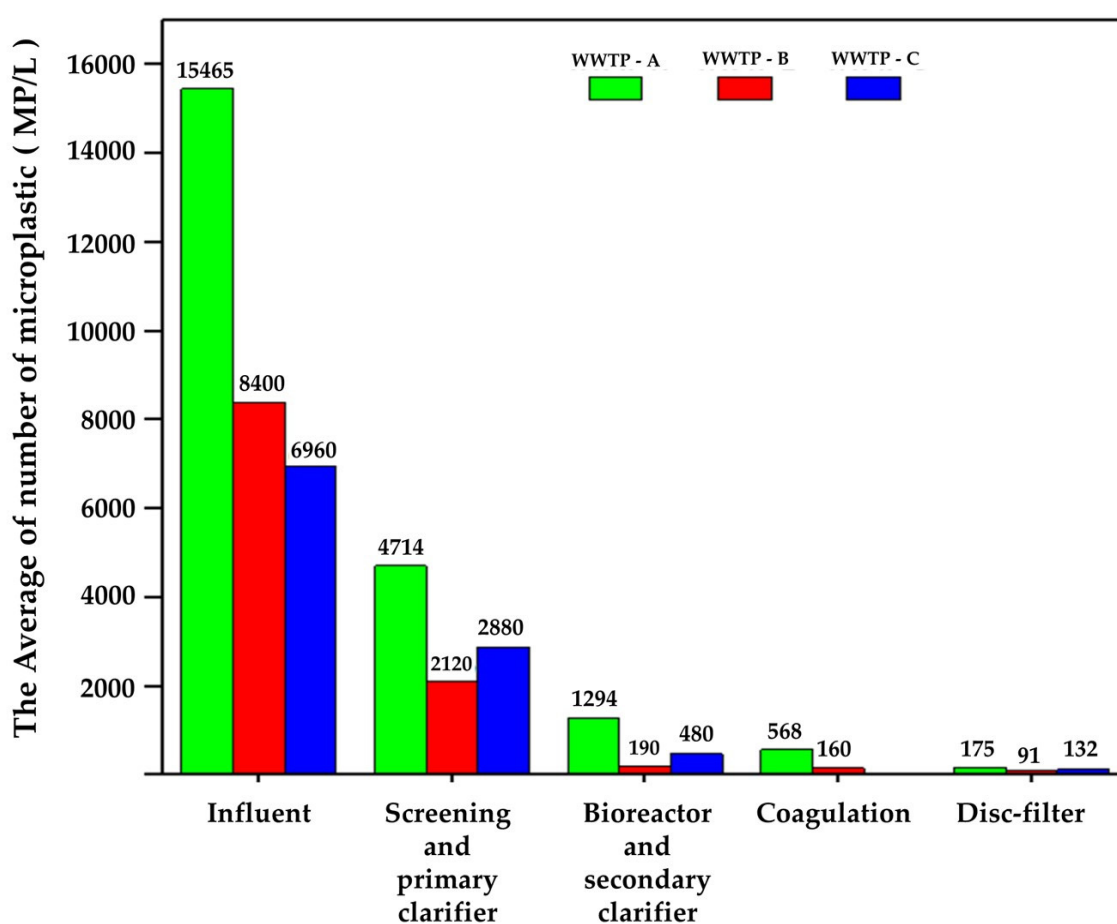

**Figure S1.** Average number of microplastics in different treatment unit

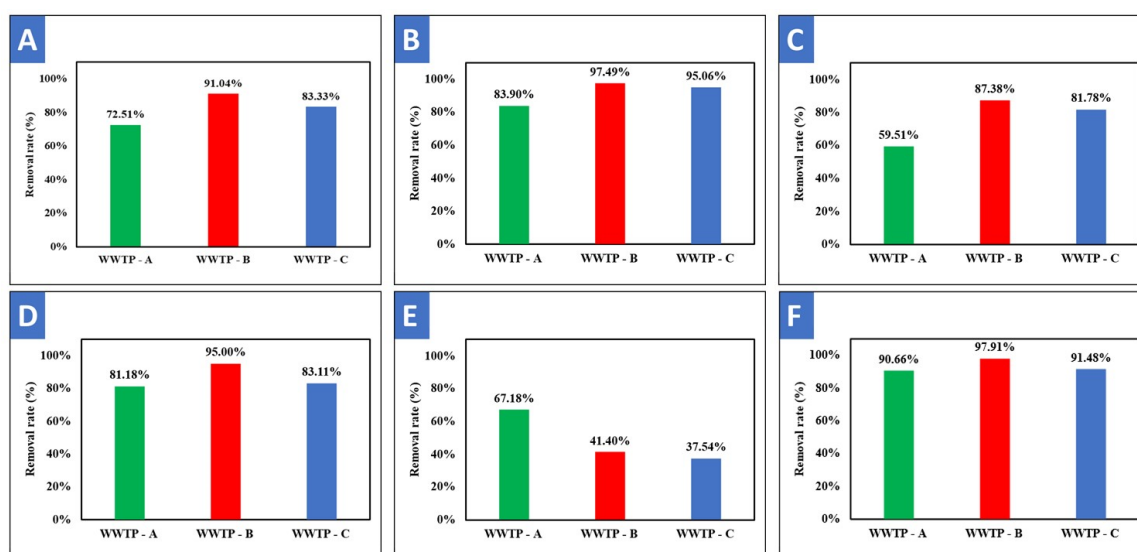

**Figure S2.** Comparisons removal rate of microplastic and water quality in Bioreactor and secondary clarifier. (A) Microplastic removal rate of bioreactor and secondary clarifier; (B) Removal rate of biological organic demand (BOD); (C) Removal rate of chemical oxygen demand (COD); (D) Removal rate of suspended solids (SS); (E) Removal rate of total nitrogen (T-N); (F) Removal rate of total phosphorus (T-P).

**Table S1.** Sampling locations and date

| WWTP | 1st                             | 2nd                             | 3rd                              |
|------|---------------------------------|---------------------------------|----------------------------------|
| A    | October 14 <sup>th</sup> , 2019 | October 28 <sup>th</sup> , 2019 | November 11 <sup>th</sup> , 2019 |
| B    |                                 |                                 |                                  |
| C    |                                 |                                 |                                  |

**Table S2.** Percentages removal efficiency at each treatment stages for organic material (BOD and COD), suspended solids (SS), total nitrogen (T-N), and total phosphorus (T-P).

| WWTP     | Parameter | Screening and primary clarifier | Bioreactor and secondary clarifier | Coagulation | Disc-filter |
|----------|-----------|---------------------------------|------------------------------------|-------------|-------------|
| WWTP - A | BOD       | 74.98%                          | 83.90%                             | 4.76%       | 60.67%      |
|          | COD       | 66.06%                          | 59.51%                             | 2.02%       | 22.42%      |
|          | SS        | 63.83%                          | 81.18%                             | 3.13%       | 16.13%      |
|          | T-N       | 20.83%                          | 67.18%                             | 15.35%      | 10.59%      |
|          | T-P       | 27.33%                          | 90.66%                             | 13.74%      | 56.34%      |
|          |           |                                 |                                    |             |             |
| WWTP - B | BOD       | 70.48%                          | 97.49%                             | 40.74%      | 12.50%      |
|          | COD       | 53.92%                          | 87.38%                             | 19.10%      | 2.78%       |
|          | SS        | 65.85%                          | 95.00%                             | 8.11%       | 11.78%      |
|          | T-N       | 51.61%                          | 41.40%                             | 2.96%       | 6.81%       |
|          | T-P       | 50.62%                          | 97.91%                             | 76.39%      | 35.29%      |
|          |           |                                 |                                    |             |             |
| WWTP - C | BOD       | 5.28%                           | 95.06%                             |             | 74.40%      |
|          | COD       | 32.87%                          | 81.78%                             |             | 48.75%      |
|          | SS        | 61.61%                          | 83.11%                             |             | 94.21%      |
|          | T-N       | 32.08%                          | 37.54%                             |             | 56.30%      |
|          | T-P       | 31.57%                          | 91.48%                             |             | 47.69%      |

**Table S3.** Overall percentages removal rate for organic material (BOD and COD), suspended solids (SS), total nitrogen (T-N), and total phosphorus (T-P).

| WWTP     | Parameter  | Screening and primary clarifier | Bioreactor and secondary clarifier | Coagulation | Disc-filter |
|----------|------------|---------------------------------|------------------------------------|-------------|-------------|
| WWTP - A | <b>BOD</b> | 74.98%                          | 96.82%                             | 98.28%      | 99.40%      |
|          | <b>COD</b> | 66.06%                          | 92.40%                             | 94.47%      | 95.63%      |
|          | <b>SS</b>  | 63.83%                          | 84.23%                             | 97.43%      | 97.84%      |
|          | <b>T-N</b> | 20.83%                          | 87.76%                             | 96.19%      | 96.42%      |
|          | <b>T-P</b> | 27.33%                          | 94.26%                             | 99.88%      | 99.96%      |
| WWTP - B | <b>BOD</b> | 70.48%                          | 98.92%                             | 99.33%      | 99.67%      |
|          | <b>COD</b> | 53.92%                          | 96.14%                             | 96.73%      | 97.38%      |
|          | <b>SS</b>  | 65.85%                          | 98.66%                             | 98.85%      | 99.00%      |
|          | <b>T-N</b> | 51.61%                          | 97.10%                             | 97.44%      | 97.54%      |
|          | <b>T-P</b> | 50.62%                          | 99.90%                             | 99.96%      | 99.99%      |
| WWTP - C | <b>BOD</b> | 5.28%                           | 95.32%                             |             | 98.80%      |
|          | <b>COD</b> | 32.87%                          | 87.77%                             |             | 93.73%      |
|          | <b>SS</b>  | 61.61%                          | 93.52%                             |             | 99.62%      |
|          | <b>T-N</b> | 32.08%                          | 57.57%                             |             | 81.46%      |
|          | <b>T-P</b> | 31.57%                          | 94.17%                             |             | 96.95%      |
